# Supplementary material
Source: PubMed Central journal article supplement (PMC3378113)

## SUPPLEMENTAL FIGURE LEGENDS

### **Figure S1. HIF1 $\alpha$ (P564A) is degraded by HPACGV in a proteasome-dependent manner.**

HEK293A cells transfected with the indicated plasmids were treated with (+) or without (-) MG132 prior to lysis. Equal amounts of protein, as indicated by anti-Vinculin immunoblot, were immunoprecipitated with anti-HA (top panel) or anti-T7 (middle panel) antibodies. Bound proteins were resolved by SDS-PAGE and immunoblotted with indicated antibodies. IP: immunoprecipitation, IB: immunoblot.

### **Figure S2. HPACGV does not bind or degrade AhR.**

(A) <sup>35</sup>S-labelled in vitro translated HPACGV was mixed with <sup>35</sup>S-labelled in vitro translated AhR. Sample mixtures were immunoprecipitated with anti-AhR antibody, resolved by SDS-PAGE and visualized by autoradiography. (B) <sup>35</sup>S-labelled in vitro translated ARNT was mixed with unlabelled in vitro translated AhR. Sample mixtures were immunoprecipitated with anti-AhR antibody, resolved by SDS-PAGE and visualized by autoradiography. (C) HEK293A cells transfected with empty plasmid (MOCK) or plasmid encoding HPACGV were lysed and equal amounts of whole cell lysates were mixed with <sup>35</sup>S-labelled in vitro translated AhR. Sample mixtures were resolved by SDS-PAGE and visualized by autoradiography. (D) HEK293A cells transfected with the indicated plasmids were lysed and equal amounts of protein, as indicated by anti-Vinculin immunoblot, were immunoprecipitated with anti-AhR (top panel) or anti-T7 (middle panel) antibodies. Bound proteins were resolved by SDS-PAGE and immunoblotted with indicated antibodies. AR: autoradiography, IP: immunoprecipitation, IB: immunoblot.

### **Figure S3. HPACGV is more potent than HPAC at inhibiting HIF-mediated transcription.**

(A) Dual-luciferase assay was performed in HEK293A cells transiently transfected with (HRE)<sub>5</sub>-Luc in combination with plasmids encoding T7-HPAC or T7-HPACGV. SV40-driven renilla luciferase was transfected as an internal control. Cells were maintained at 1% oxygen for 16 hours prior to analysis. Error bars represent standard deviations. (B) Expression levels of transfected T7-HPAC and T7-HPACGV in (A) were determined via Western blot analysis. Asterisk represents proteins non-specifically recognized by T7 antibody. IB: immunoblot.

### **Figure S4. Dorsal skin-fold window chamber setup.**

The titanium window chamber was surgically implanted into the dorsal skin of SCID mice. 786-dsRed cells were injected into the dorsal dermis. Visualization of the tumour and associated vasculature were facilitated by a circular glass coverslip positioned over the incision.

Fig. S1

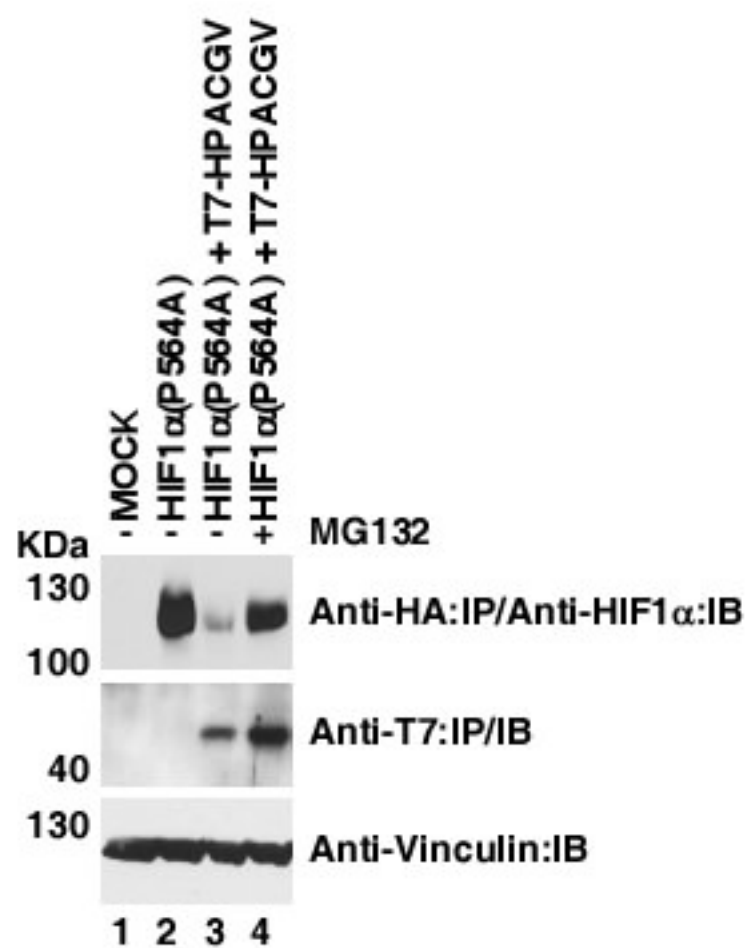

Fig. S2

A

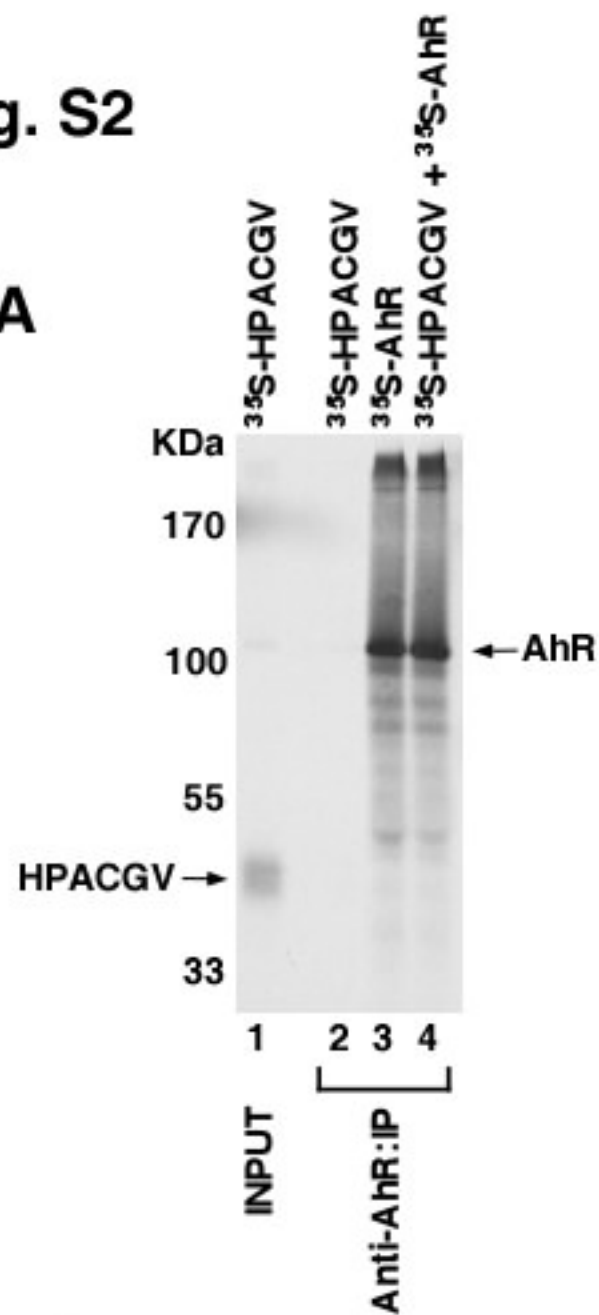

B

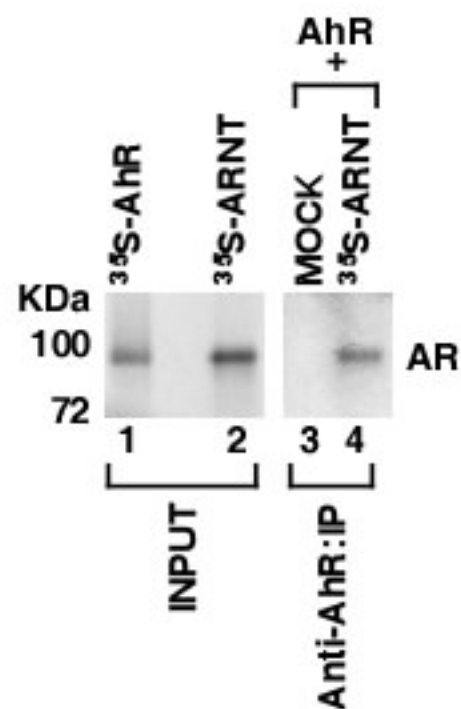

C

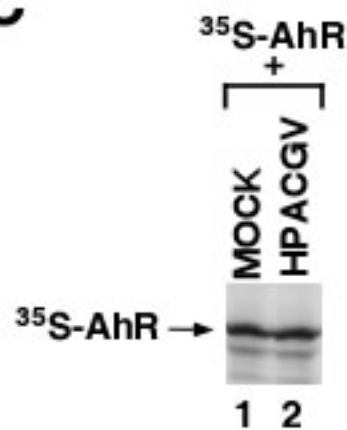

D

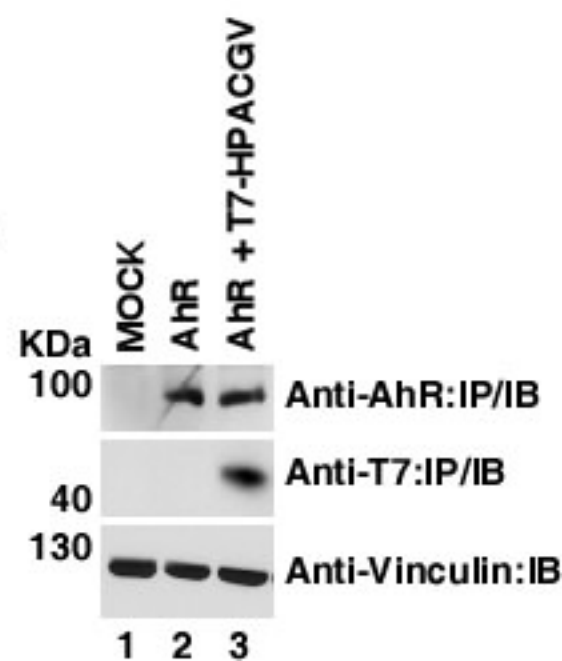

**Fig. S3**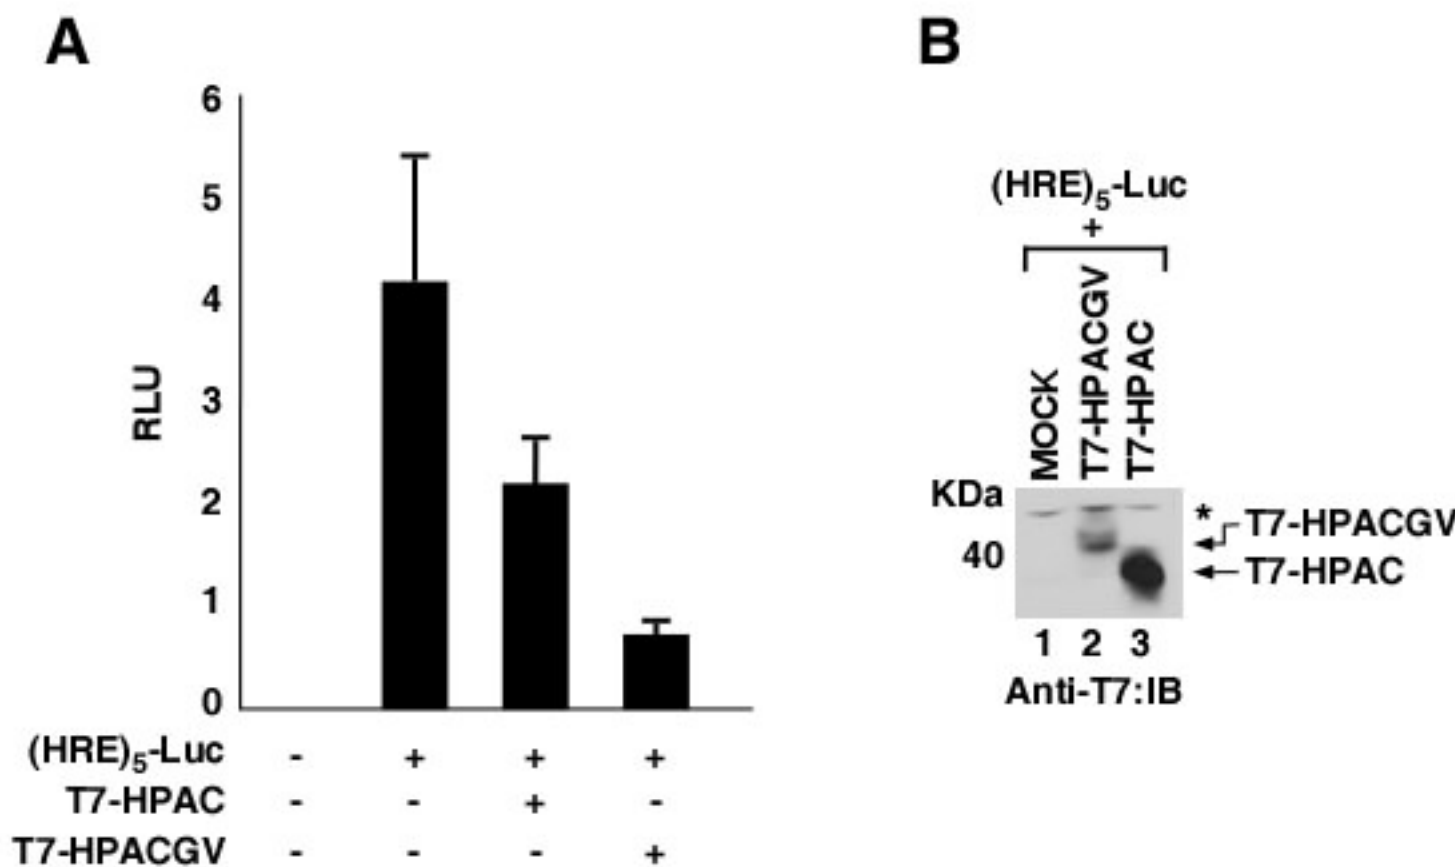**Fig. S4**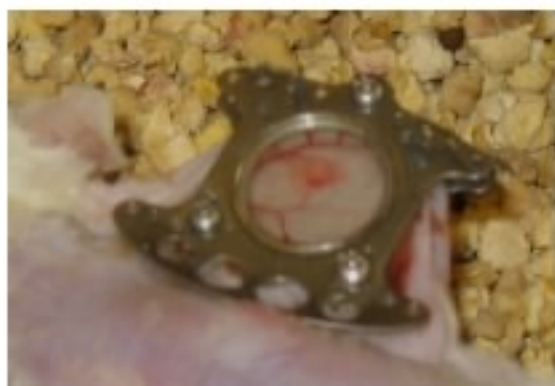

Supplement: emmm0001-0066-SD1.pdf [file emmm0001-0066-SD1.pdf]
